# Supplementary material for: Neurotoxin-mediated potent activation of the axon degeneration regulator SARM1
Source: eLife journal article supplement (doi:10.7554/elife.72823), 2021-12-06
Supplement: supp [file elife-72823-supp-v1.zip]

Archive with 22 entries (22 files):
- elife_poa_e72823_Figure_1_source_data_1.xlsx
- elife_poa_e72823_Figure_2_source_data_1.xlsx
- elife_poa_e72823_Figure_2_figure_supplement_1_source_data_1.xlsx
- elife_poa_e72823_Figure_2_figure_supplement_2_source_data_1.xlsx
- elife_poa_e72823_Figure_3_source_data_1.xlsx
- elife_poa_e72823_Figure_3_figure_supplement_1_source_data_1.xlsx
- elife_poa_e72823_Figure_4_source_data_1.xlsx
- elife_poa_e72823_Figure_4_figure_supplement_1_source_data_1.xlsx
- elife_poa_e72823_Figure_5_source_data_1.xlsx
- elife_poa_e72823_Figure_5_figure_supplement_1_source_data_1.xlsx
- elife_poa_e72823_Figure_7_source_data_1.xlsx
- elife_poa_e72823_Transparent_Reporting_File.docx
- elife_poa_e72823_Figure_2_figure_supplement_1.pdf
- elife_poa_e72823_Figure_2_figure_supplement_2.pdf
- elife_poa_e72823_Figure_3_figure_supplement_1.pdf
- elife_poa_e72823_Figure_4_figure_supplement_1.pdf
- elife_poa_e72823_Figure_5_figure_supplement_1.pdf
- elife_poa_e72823_Figure_5_figure_supplement_2.pdf
- elife_poa_e72823_Figure_6_figure_supplement_1.pdf
- elife_poa_e72823_Figure_6_figure_supplement_2.pdf
- elife_poa_e72823_Figure_7_figure_supplement_1.pdf
- elife_poa_e72823_Supplementary_file_1.docx
