# Supplementary material for: Neurotoxin-mediated potent activation of the axon degeneration regulator SARM1
Source: eLife journal article supplement (doi:10.7554/elife.72823), 2021-12-06
Supplement: supp [file elife-72823-supp-v1.zip › elife_poa_e72823_Figure_1_source_data_1.xlsx]

## Sheet: Figure 1C-J
	Figure 1 - Source data 1
		DRG neurons - Degeneration index Figure 1 C,D
				Exp 1	Exp 2	Exp 3			Exp 1	Exp 2	Exp 3			Exp 1	Exp 2	Exp 3			Exp 1	Exp 2	Exp 3
			Time (hours)	+Vehicle			Mean	SEM	+10 μM Vacor			Mean	SEM	+50 μM Vacor			Mean	SEM	+100 μM Vacor			Mean	SEM
			0	0.161167	0.177567	0.159967	0.166233	0.00567725	0.1732	0.1494	0.102067	0.141556	0.0209057	0.162367	0.1746	0.1533	0.163422	0.00617139	0.184367	0.221933	0.109067	0.171789	0.0331832
			4	0.1468	0.119267	0.175367	0.147144	0.0161956	0.1784	0.119267	0.136667	0.144778	0.0175455	0.241967	0.165133	0.136667	0.181256	0.0314482	0.670633	0.484933	0.962967	0.706178	0.139136
			8	0.148133	0.117237	0.1388	0.134723	0.00914905	0.204333	0.130933	0.1705	0.168589	0.0212103	0.697567	0.511567	0.862667	0.6906	0.101414	0.777233	1	1	0.925744	0.0742556
			24	0.149133	0.126633	0.127133	0.1343	0.00741807	0.195067	0.14334	0.1612	0.166536	0.0151686	0.810467	1	1	0.936822	0.0631778	1	1	1	1	0
			48	0.1169	0.1133	0.1604	0.1302	0.0151357	0.1734	0.10586	0.1377	0.138987	0.0195077	0.890467	1	1	0.963489	0.0365111	1	1	1	1	0
		SCG neurons - Degeneration index Figure 1E,F
				Exp 1	Exp 2	Exp 3			Exp 1	Exp 2	Exp 3			Exp 1	Exp 2	Exp 3			Exp 1	Exp 2	Exp 3
			Time (hours)	+Vehicle			Mean	SEM	+10 μM Vacor			Mean	SEM	+50 μM Vacor			Mean	SEM	+100 μM Vacor			Mean	SEM
			0	0.283433	0.2334	0.219633	0.245489	0.0193839	0.2095	0.2712	0.174333	0.218344	0.0283105	0.228067	0.243767	0.1313	0.201044	0.0351655	0.248167	0.292033	0.173367	0.237856	0.0346417
			4	0.261	0.299333	0.194333	0.251555	0.0306765	0.331567	0.261133	0.175633	0.256111	0.0450841	0.357833	0.298733	0.249267	0.301944	0.0313816	0.379633	0.347867	0.25	0.325833	0.0390098
			8	0.291067	0.257467	0.2099	0.252811	0.0235461	0.218733	0.2731	0.199133	0.230322	0.0221246	0.348367	0.417367	0.319233	0.361656	0.0290974	0.6159	0.825367	0.731567	0.724278	0.0605775
			24	0.260767	0.322567	0.166467	0.249933	0.0453866	0.269267	0.253033	0.186733	0.236344	0.0252443	0.535467	0.399767	0.703067	0.5461	0.0877164	0.667867	1	0.716267	0.794711	0.103591
			48	0.2527	0.311533	0.2072	0.257144	0.0302003	0.205467	0.246367	0.193733	0.215189	0.0159528	0.471767	0.488667	1	0.653478	0.17333	0.735833	1	1	0.911944	0.0880556
		SCG neurons - Degeneration index Figure 1G,H
				Exp 1	Exp 2	Exp 3			Exp 1	Exp 2	Exp 3			Exp 1	Exp 2	Exp 3			Exp 1	Exp 2	Exp 3
			Time (hours)	Vehicle			Mean	SEM	+100μM Vacor			Mean	SEM	+1mM Nicotinamide			Mean	SEM	+100μM Vacor+1mM Nicotinamide			Mean	SEM
			0	0.125067	0.134233	0.184633	0.147978	0.0185178	0.131033	0.145267	0.180333	0.152211	0.0146491	0.167467	0.213133	0.144233	0.174944	0.0202381	0.194167	0.214133	0.150133	0.186144	0.0189056
			8	0.175467	0.187167	0.1276	0.163411	0.0182213	0.6384	0.535333	0.750467	0.6414	0.0621218	0.206167	0.165833	0.1629	0.1783	0.013959	0.2238	0.3051	0.2285	0.252467	0.0263516
			24	0.1751	0.208	0.191967	0.191689	0.00949843	0.725967	1	1	0.908656	0.0913444	0.184767	0.192067	0.178567	0.185133	0.00390142	0.2282	0.4186	0.3106	0.319133	0.0551291
			48	0.184467	0.211467	0.194033	0.196656	0.00790373	0.696933	1	1	0.898978	0.101022	0.155733	0.227367	0.173533	0.185544	0.0215332	0.283467	0.491933	0.3294	0.368267	0.0632391
			72	0.1484	0.238133	0.273467	0.22	0.0372247	1	1	1	1	0	0.169733	0.203833	0.202967	0.192178	0.011225	0.328333	0.490433	0.267733	0.362167	0.0664764
		SCG neurons - Degeneration index Figure 1I,J
				Exp 1	Exp 2	Exp 3			Exp 1	Exp 2	Exp 3			Exp 1	Exp 2	Exp 3			Exp 1	Exp 2	Exp 3
			Time (hours)	+Vehicle			Mean	SEM	+100μM Vacor			Mean	SEM	+100nM FK866			Mean	SEM	+100μM Vacor+100nM FK866			Mean	SEM
			0	0.166633	0.185333	0.186433	0.179467	0.00642452	0.1541	0.149667	0.161767	0.155178	0.00353429	0.164267	0.197033	0.174367	0.178556	0.00968803	0.147233	0.1698	0.164067	0.160367	0.00677203
			8	0.146033	0.245833	0.1706	0.187489	0.0300219	0.6247	0.701167	0.624533	0.650133	0.0255167	0.1352	0.225533	0.1818	0.180844	0.0260814	0.197867	0.263133	0.2319	0.230967	0.0188466
			24	0.193167	0.173367	0.1894	0.185311	0.0060704	1	1	1	1	0	0.153867	0.210467	0.162533	0.175622	0.0176009	0.263833	0.2862	0.2731	0.274378	0.00648823
			48	0.158433	0.192933	0.196633	0.182667	0.0121637	1	1	1	1	0	0.258067	0.310467	0.2213	0.263278	0.0258717	0.358033	0.399533	0.3125	0.356689	0.0251334
			72	0.158133	0.184367	0.255	0.199167	0.0289256	1	1	1	1	0	0.273367	0.373367	0.378067	0.3416	0.0341436	0.442167	0.4398	0.3626	0.414856	0.0261367
