# Supplementary material for: Neurotoxin-mediated potent activation of the axon degeneration regulator SARM1
Source: eLife journal article supplement (doi:10.7554/elife.72823), 2021-12-06
Supplement: supp [file elife-72823-supp-v1.zip › elife_poa_e72823_Figure_2_figure_supplement_1_source_data_1.xlsx]

## Sheet: Figure 2-Fig supplement 1 C-F 
	Figure 2 - Figure supplement 1 source data 1
		DRG SARM1 Western blot - Value normalised to b-Actin C-F
			DRG ganglia
				Exp 1	Exp 2	Exp 3	Exp 4			Exp 1	Exp 2	Exp 3	Exp 4
			Time (hours)	Wild-type +Vehicle				Mean	SEM	Wild-type +50 μM Vacor				Mean	SEM
			0	1	1	1	1	1	0	1	1	1	1	1	0
			2	0.869524	0.998514	0.442019	0.741567	0.762906	0.11913	0.668404	0.821752	0.55334	0.860909	0.726101	0.0710034
			4	0.758373	0.880875	0.494716	0.93756	0.767881	0.0984327	0.944254	0.999318	0.46929	0.622843	0.758926	0.127326
			DRG neurites
				Exp 1	Exp 2	Exp 3	Exp 4			Exp 1	Exp 2	Exp 3	Exp 4
			Time (hours)	Wild-type +Vehicle				Mean	SEM	Wild-type +50 μM Vacor				Mean	SEM
			0	1	1	1	1	1	0	1	1	1	1	1	0
			2	0.797584	0.713987	0.570446	0.878049	0.740016	0.0657005	0.889915	0.788652	0.877841	0.814289	0.842674	0.0244821
			4	0.963474	1.11547	1.02422	0.969461	1.01816	0.0352005	0.666965	0.997345	1.48977	0.775405	0.982372	0.182574
