# Supplementary material for: Neurotoxin-mediated potent activation of the axon degeneration regulator SARM1
Source: eLife journal article supplement (doi:10.7554/elife.72823), 2021-12-06
Supplement: supp [file elife-72823-supp-v1.zip › elife_poa_e72823_Figure_2_figure_supplement_2_source_data_1.xlsx]

## Sheet: Figure 2-Fig supplement 2 A-B
	Figure 2 - Figure supplement 2 source data 1
		Microfluidic chambers A,B
		DRG -Degeneration index
				Exp 1	Exp 2	Exp 3	Exp 4			Exp 1	Exp 2	Exp 3	Exp 4			Exp 1	Exp 2	Exp 3	Exp 4			Exp 1	Exp 2	Exp 3	Exp 4
			Time (hours)	Vehicle CB+axon side				Mean	SEM	50um Vacor CB side				Mean	SEM	50uM Vacor axon side				Mean	SEM	50uM Vacor CB+axon side				Mean	SEM
			0	0.2666	0.34875	0.31305	0.3261	0.313625	0.0173231	0.20495	0.40215	0.342	0.4074	0.339125	0.0471211	0.21855	0.42255	0.3148	0.32395	0.319962	0.0416846	0.3099	0.4096	0.2794	0.3223	0.3303	0.0279277
			4	0.2365	0.2167	0.2943	0.25805	0.251387	0.0166101	0.2477	0.3339	0.35985	0.35305	0.323625	0.0258977	0.3118	0.32915	0.22335	0.33685	0.300288	0.0261753	0.6742	0.41855	0.369	0.50175	0.490875	0.0669644
			8	0.30305	0.28625	0.3157	0.2517	0.289175	0.0138715	0.51255	0.68065	0.806	0.6755	0.668675	0.0601548	0.57345	0.4131	0.46615	0.59015	0.510713	0.0425836	0.67825	0.6101	0.7154	0.66025	0.666	0.0218866
			12	0.227	0.217	0.3114	0.3592	0.27865	0.0341922	1	0.7312	0.8201	0.64515	0.799113	0.0758907	0.6591	0.4087	0.536	0.6022	0.5515	0.0538364	0.843	0.6103	0.7336	0.7138	0.725175	0.0476789
			24	0.28315	0.2445	0.40795	0.34125	0.319213	0.0356399	1	0.9107	1	0.60855	0.879812	0.0928383	0.72305	0.448	0.6091	0.7815	0.640412	0.0734493	1	0.792	0.6735	0.7735	0.80975	0.0685494
			48	0.3585	0.2687	0.35115	0.35985	0.33455	0.0220331	1	1	1	1	1	0	0.6795	0.44135	0.6277	0.72825	0.6192	0.0627368	1	1	1	1	1	0
		DRG - % viable neurons
				Exp 1	Exp 2	Exp 3	Exp 4			Exp 1	Exp 2	Exp 3	Exp 4			Exp 1	Exp 2	Exp 3	Exp 4			Exp 1	Exp 2	Exp 3	Exp 4
			Time (hours)	Vehicle CB+axon side				Mean	SEM	50um Vacor CB side				Mean	SEM	50uM Vacor axon side				Mean	SEM	50uM Vacor CB+axon side				Mean	SEM
			0	100	100	100	100	100	0	100	100	100	100	100	0	100	100	100	100	100	0	100	100	100	100	100	0
			4	98.2456	96.2757	100	100	98.6303	0.887144	100	98.9418	82.6694	92.7143	93.5814	3.97655	100	99.4536	98.0392	100	99.3732	0.462937	75.4902	98.1481	87.3065	55.8965	79.2103	9.04416
			8	98.2456	94.7759	100	100	98.2554	1.23134	12.9258	12.1378	2.38095	11	9.61114	2.44226	97.8982	99.4536	98.0392	100	98.8477	0.520421	2.5641	1.23457	1.75439	1.04167	1.64868	0.340236
			12	98.2456	94.0007	100	100	98.0616	1.41538	0	1.04167	0	0	0.260417	0.260417	97.8982	99.4536	96.0784	100	98.3575	0.880542	0	0	0	0	0	0
			24	96.4912	92.5008	100	100	97.248	1.78548	0	0	0	0	0	0	96.7488	95.8473	96.0784	95.303	95.9944	0.29941	0	0	0	0	0	0
			48	93.2217	92.5008	100	97.2222	95.7362	1.76017	0	0	0	0	0	0	80.038	95.3009	77.451	89.5308	85.5802	4.15229	0	0	0	0	0	0
