# Supplementary material for: Neurotoxin-mediated potent activation of the axon degeneration regulator SARM1
Source: eLife journal article supplement (doi:10.7554/elife.72823), 2021-12-06
Supplement: supp [file elife-72823-supp-v1.zip › elife_poa_e72823_Figure_2_source_data_1.xlsx]

## Sheet: Figure 2 A-D
	Figure 2-source data 1
		DRG neurons - Degeneration index Figure 2A,B
			Exp 1	Exp 2	Exp 3	Exp 4			Exp 1	Exp 2	Exp 3	Exp 4			Exp 1	Exp 2	Exp 3	Exp 4			Exp 1	Exp 2	Exp 3	Exp 4
		Time (hours)	Wild-type +Vehicle				Mean	SEM	Wild-type +50 μM Vacor				Mean	SEM	Sarm1-/- +Vehicle				Mean	SEM	Sarm1-/- +50 μM Vacor				Mean	SEM
		0	0.235	0.322633	0.254	0.2727	0.271083	0.0188279	0.2057	0.301333	0.212633	0.1737	0.223342	0.0273449	0.2197	0.212133	0.2469	0.299867	0.24465	0.0198616	0.190233	0.305867	0.182733	0.251933	0.232692	0.0289012
		8	0.220067	0.255367	0.176233	0.254467	0.226533	0.0186716	0.593933	0.725767	0.801967	0.5588	0.670117	0.0567719	0.186567	0.2513	0.2445	0.212067	0.223608	0.0150238	0.2074	0.312533	0.177733	0.262533	0.24005	0.029873
		24	0.258433	0.2733	0.244233	0.266233	0.26055	0.00622881	0.738633	0.744267	0.775667	0.749267	0.751958	0.00819577	0.186367	0.257533	0.214367	0.251267	0.227383	0.0166614	0.223633	0.3299	0.188667	0.2736	0.25395	0.0307348
		48	0.206733	0.2057	0.2357	0.208833	0.214242	0.00718242	1	0.784467	0.7986	0.861567	0.861158	0.0492209	0.1933	0.2816	0.265667	0.259867	0.250108	0.0194855	0.235467	0.2383	0.190867	0.2312	0.223958	0.0111266
		72	0.224767	0.223967	0.229733	0.315433	0.248475	0.0223559	1	0.831233	0.885	1	0.929058	0.0424031	0.177467	0.2828	0.209	0.209167	0.219608	0.0223433	0.2393	0.1476	0.181667	0.231367	0.199983	0.0216222
		SCG neurons - Degeneration index Figure 2C,D
			Exp 1	Exp 2	Exp 3	Exp 4			Exp 1	Exp 2	Exp 3	Exp 4			Exp 1	Exp 2	Exp 3	Exp 4			Exp 1	Exp 2	Exp 3	Exp 4
		Time (hours)	Wild-type +Vehicle				Mean	SEM	Wild-type +50 μM Vacor				Mean	SEM	Sarm1-/- +Vehicle				Mean	SEM	Sarm1-/- +50 μM Vacor				Mean	SEM
		0	0.336967	0.266067	0.1831	0.206367	0.248125	0.0343836	0.292133	0.272933	0.2008	0.187167	0.238258	0.0260102	0.287667	0.3523	0.125767	0.199967	0.241425	0.0496044	0.3417	0.3055	0.174733	0.158233	0.245042	0.0460769
		8	0.3112	0.256267	0.138633	0.195467	0.225392	0.0373484	1	0.713633	0.828967	0.672967	0.803892	0.0732434	0.337	0.322333	0.151733	0.172267	0.245833	0.0486745	0.354233	0.3318	0.207833	0.1685	0.265592	0.0456469
		24	0.3259	0.312333	0.133967	0.2065	0.244675	0.0455419	1	0.696533	1	1	0.924133	0.0758667	0.3184	0.253067	0.149967	0.2254	0.236708	0.0348725	0.362667	0.367133	0.1997	0.231067	0.290142	0.0436436
		48	0.306033	0.3045	0.153733	0.189133	0.23835	0.0393056	1	0.8177	1	1	0.954425	0.045575	0.310533	0.2908	0.1478	0.174433	0.230892	0.0408489	0.384567	0.344133	0.143033	0.197833	0.267392	0.0576792
		72	0.2474	0.296433	0.132633	0.271733	0.23705	0.0362161	1	1	1	1	1	0	0.272433	0.291033	0.1165	0.175867	0.213958	0.041139	0.341233	0.300233	0.1466	0.146133	0.23355	0.0510264

## Sheet: Figure 2 E-F
	Figure 2-source data 1
		DRG outgrowth - Figure 2E,F
			Exp 1	Exp 2	Exp 3	Exp 4	Exp 5			Exp 1	Exp 2	Exp 3	Exp 4	Exp 5			Exp 1	Exp 2	Exp 3	Exp 4	Exp 5			Exp 1	Exp 2	Exp 3	Exp 4	Exp 5
		Days in vitro	Wild-type +Vehicle					Mean	SEM	Wild-type +50 μM Vacor					Mean	SEM	Sarm1-/- +Vehicle					Mean	SEM	Sarm1-/- +50 μM Vacor					Mean	SEM
		0	0	0	0	0	0	0	0	0	0	0	0	0	0	0	0	0	0	0	0	0	0	0	0	0	0	0	0	0
		2	2.4025	1.5125	2.565	2.3125	2.63	2.2845	0.20109	2.56	1.95	2.36	2.01	2.57	2.29	0.132325	2.3975	1.945	2.3275	2.49	2.7325	2.3785	0.128186	2.345	1.96	2.255	2.4075	2.7475	2.343	0.126929
		3	3.13	2.46	3.105	3.1575	3.43	3.0565	0.160198	0	0	0	0	0	0	0	3.135	2.78	3.0125	3.2475	3.605	3.156	0.136452	2.915	2.645	2.555	3.16	3.2825	2.9115	0.140982
		5	3.9325	3.455	3.91	3.99	4.29	3.9155	0.133825	0	0	0	0	0	0	0	4.0025	3.6125	3.8075	4.5525	4.2125	4.0375	0.16288	3.3075	3.11	3.25	4.29	4	3.5915	0.232798
		7	4.77	4.2375	4.8125	5.2125	4.9175	4.79	0.15826	0	0	0	0	0	0	0	4.7575	4.3525	4.615	5.6725	4.9425	4.868	0.223017	4.2775	3.835	3.8275	4.7	4.665	4.261	0.190474

## Sheet: Figure 2 G-I
	Figure 2-source data 1
		Microinjection hSARM1 E642A
			Exp 1	Exp 2	Exp 3			Exp 1	Exp 2	Exp 3			Exp 1	Exp 2	Exp 3			Exp 1	Exp 2	Exp 3
		Time (hours)	hSARM1 +Vehicle			Mean	SEM	hSARM1 +100 μM Vacor			Mean	SEM	E642A hSARM1 +Vehicle			Mean	SEM	E642A hSARM1+100 μM Vacor			Mean	SEM
		0	100	100	100	100	0	100	100	100	100	0	100	100	100	100	0	100	100	100	100	0
		8	59.5238	95.8333	87.1429	80.8333	10.9461	12.9448	17.6667	43.3333	24.6483	9.44144	79.6581	84.6445	89.2704	84.5243	2.77546	87.1184	80.057	82.3084	83.1613	2.08259
