# Supplementary material for: Neurotoxin-mediated potent activation of the axon degeneration regulator SARM1
Source: eLife journal article supplement (doi:10.7554/elife.72823), 2021-12-06
Supplement: supp [file elife-72823-supp-v1.zip › elife_poa_e72823_Figure_3_figure_supplement_1_source_data_1.xlsx]

## Sheet: Figure 3-Fig supplement 1 A-B
	Figure 3 - Figure supplement 1 source data 1
		Panel A						Panel B
		PBS control pSRT (RGC responses)						PBS control RGC counting
			Naive	PBS	DMSO				Naive	PBS	DMSO
		Mouse 1	81.2563	44.5125	49.8243			Mouse 1	2849.1	2956.24	2824.05
		Mouse 2	68.564	50.6015	32.364			Mouse 2	2670.29	2721.43	2652.2
		Mouse 3			23.3436			Mouse 3			2738.47
		Mouse 4			37.6973			Mouse 4			2546.1
		Mouse 5			32.7149			Mouse 5			2726.64
		Mouse 6			30.6192
								Mean	2759.69	2838.83	2697.49
		Mean	74.9101	47.557	34.4272			SD	126.436	166.04	104.305
		SD	8.97482	4.30554	8.85776
		PBS control B wave (bipolar responses)
			Naive	PBS	DMSO
		Mouse 1	1068.03	617.087	711.053
		Mouse 2	982.267	694.782	922.972
		Mouse 3			545.629
		Mouse 4			879.99
		Mouse 5			741.73
		Mouse 6			605.245
		Mean	1025.15	655.934	734.436
		SD	60.6419	54.9387	148.101
		PBS control A wave (photoreceptor responses )
			Naive	PBS	DMSO
		Mouse 1	-659.493	-446.72	-525.836
		Mouse 2	-643.228	-429.737	-648.685
		Mouse 3			-699.098
		Mouse 4			-624.566
		Mouse 5			-577.339
		Mouse 6			-525.836
		Mean	-651.361	-438.229	-600.227
		SD	11.5011	12.0089	69.7251
