# Supplementary material for: Neurotoxin-mediated potent activation of the axon degeneration regulator SARM1
Source: eLife journal article supplement (doi:10.7554/elife.72823), 2021-12-06
Supplement: supp [file elife-72823-supp-v1.zip › elife_poa_e72823_Figure_3_source_data_1.xlsx]

## Sheet: Figure 3 C
	Figure 2 source data 1
		pSRT RGC responses Figure 3 C
			Mouse 1	Mouse 2	Mouse 3	Mouse 4	Mouse 5	Mouse 6			Mouse 1	Mouse 2	Mouse 3	Mouse 4	Mouse 5	Mouse 6
			Wild-type						Mean	SEM	SARM1 KO						Mean	SEM
		DMSO	49.8243	32.364	23.3436	37.6973	32.7149	30.6192	34.4272	3.61617	30.3533	33.0797	30.2316	35.749	45.5103	43.7458	36.445	2.72645
		100mM Vacor	-1.41206	0.329408	1.56192	3.12752	0.903994	1.34407	0.975809	0.611935	49.6466	26.1824	37.352	52.4316	35.7257	38.5589	39.9829	3.94074
		B wave bipolar responses Figure 3 C
			Mouse 1	Mouse 2	Mouse 3	Mouse 4	Mouse 5	Mouse 6			Mouse 1	Mouse 2	Mouse 3	Mouse 4	Mouse 5	Mouse 6
			Wild-type						Mean	SEM	SARM1 KO						Mean	SEM
		DMSO	711.053	922.972	545.629	879.99	741.73	605.245	734.436	60.4622	478.685	931.974	862.971	648.282	637.367	740.692	716.662	67.3151
		100mM Vacor	4.38577	12.0013	1.00372	3.25869	2.07414	-1.15324	3.59507	1.85273	736.893	895.649	657.412	846.895	619.634	769.398	754.313	43.4383
		A wave phottoreceptor responses Figure 3 C
			Mouse 1	Mouse 2	Mouse 3	Mouse 4	Mouse 5	Mouse 6			Mouse 1	Mouse 2	Mouse 3	Mouse 4	Mouse 5	Mouse 6
			Wild-type						Mean	SEM	SARM1 KO						Mean	SEM
		DMSO	-525.836	-648.685	-699.098	-624.566	-577.339	-525.836	-600.227	28.4651	-323.22	-614.499	-725.453	-504.545	-523.587	-567.992	-543.216	54.5235
		100mM Vacor	-48.425	-54.4867	-0.43915	-10.8278	-2.62604	-2.75662	-19.9269	10.1048	-548.075	-665.139	-580.449	-603.208	-588.444	-547.401	-588.786	17.7741

## Sheet: Figure 3 D-E
	Figure 3 source data 1
		RGC counting Figure 3 D,E
			Mouse 1	Mouse 2	Mouse 3	Mouse 4	Mouse 5			Mouse 1	Mouse 2	Mouse 3	Mouse 4	Mouse 5
			Wild-type					Mean	SEM	SARM1 KO					Mean	SEM
		DMSO	2824.05	2652.2	2738.47	2546.1	2726.64	2697.49	46.6464	2858.84	2905.45	2742.99	2708.21	2802.48	2803.59	36.1933
		100mM Vacor	2205.81	2036.81	2164.48	1938.01	1818.69	2032.76	71.4542	2714.47	2640.72	2797.96	2678.99	2591.32	2684.69	34.9287
