# Supplementary material for: Neurotoxin-mediated potent activation of the axon degeneration regulator SARM1
Source: eLife journal article supplement (doi:10.7554/elife.72823), 2021-12-06
Supplement: supp [file elife-72823-supp-v1.zip › elife_poa_e72823_Figure_4_figure_supplement_1_source_data_1.xlsx]

## Sheet: Figure 4-Fig supplement 1 B-D
	Figure 4 - Figure supplement 1 source data 1
		NMN deamideas activity Figure 3 - Figure supplement 1B
			Control	Vacor	VMN	VAD
		Exp 1	100	93.09	90.98	96.09
		Exp 2	100	98.12	100.28	107.64
		Mean	100	95.605	95.63	101.865
		SD	0	3.55675	6.57609	8.16708
		WLDs - degeneration index Figure 3 - Figure supplement 1C,D
			Exp 1	Exp 2	Exp 3	Exp 4			Exp 1	Exp 2	Exp 3	Exp 4			Exp 1	Exp 2	Exp 3	Exp 4			Exp 1	Exp 2	Exp 3	Exp 4
		Time (hours)	Wild-type +Veichle				Mean	SEM	Wild-type +50 μM Vacor				Mean	SEM	WldS+Veichle				Mean	SEM	WldS+50 μM Vacor				Mean	SEM
		0	0.290033	0.238867	0.236333	0.210067	0.243825	0.0167221	0.2563	0.2594	0.255633	0.208667	0.245	0.0121389	0.238233	0.174267	0.1929	0.261467	0.216717	0.0200723	0.2029	0.2737	0.201033	0.222967	0.22515	0.0169277
		8	0.2942	0.211533	0.2636	0.258467	0.25695	0.0170703	0.577033	0.6186	0.650467	0.47055	0.579163	0.0392012	0.314967	0.2488	0.2584	0.2245	0.261667	0.0191452	0.541433	0.641467	0.510167	0.589467	0.570633	0.0286951
		24	0.2791	0.199867	0.228867	0.2427	0.237633	0.0164528	0.657967	0.9088	1	1	0.891692	0.0808195	0.249867	0.2319	0.292067	0.218267	0.248025	0.0160433	0.853133	0.8459	0.9497	1	0.912183	0.0376382
