# Supplementary material for: Neurotoxin-mediated potent activation of the axon degeneration regulator SARM1
Source: eLife journal article supplement (doi:10.7554/elife.72823), 2021-12-06
Supplement: supp [file elife-72823-supp-v1.zip › elife_poa_e72823_Figure_4_source_data_1.xlsx]

## Sheet: Figure 4 A-B 
	Figure 4 source data 1
							N.B. Please note that time 0h measurements were taken before treatments, hence why values are the same at time 0h in Wild-type+ Vehicle and Vacor groups and in SARM1 KO + Vehicle and vacor groups.
		DRG nucleotide mesurements Figure 4 A,B					To avoid affecting the power of the statistical test performed, time 0h was excluded from the analysis, which was performed on time points 2 and 4 hours.
			NAD ganglia
			Exp 1	Exp 2	Exp 3	Exp 4			Exp 1	Exp 2	Exp 3	Exp 4			Exp 1	Exp 2	Exp 3	Exp 4			Exp 1	Exp 2	Exp 3	Exp 4
		Time (hours)	Wild-type +Vehicle				Mean	SEM	Wild-type +50uM Vacor				Mean	SEM	SARM1 KO +Vehicle				Mean	SEM	SARM1 KO +50uM Vacor				Mean	SEM
		0	2.065	3.429	3.179	4.01	3.17075	0.407613	2.065	3.429	3.179	4.01	3.17075	0.407613	2.974	3.566	2.212	NA	2.91733	0.391892	2.974	3.566	2.212	NA	2.91733	0.391892
		2	3.337	5.093	2.819	4.659	3.977	0.537056	0.54	0.671	0.671	1.02	0.7255	0.102908	2.085	2.884	3.292	3.543	2.951	0.319008	2.109	4.678	3.737	4.3	3.706	0.566347
		4	2.314	1.369	3.368	4.416	2.86675	0.658294	0.298	0.39	0.393	0.569	0.4125	0.0566341	3.429	7.627	3.861	4.529	4.8615	0.949193	3.437	4.111	3.822	3.837	3.80175	0.138543
		8	NA	NA	NA	NA	NA	NA	NA	NA	NA	NA	NA	NA	2.545	6.587	3.459	4.416	4.25175	0.867075	2.579	4.977	3.735	3.664	3.73875	0.490228
			NAD neurites
			Exp 1	Exp 2	Exp 3	Exp 4			Exp 1	Exp 2	Exp 3	Exp 4			Exp 1	Exp 2	Exp 3	Exp 4			Exp 1	Exp 2	Exp 3	Exp 4
		Time (hours)	Wild-type +Vehicle				Mean	SEM	Wild-type +50uM Vacor				Mean	SEM	SARM1 KO +Vehicle				Mean	SEM	SARM1 KO +50uM Vacor				Mean	SEM
		0	2.214	4.043	5.373	4.788	4.1045	0.686418	2.214	4.043	5.373	4.788	4.1045	0.686418	3.173	5.86	4.069	4.78	4.4705	0.56798	3.173	5.86	4.069	4.78	4.4705	0.56798
		2	3.566	5.549	4.974	4.953	4.7605	0.421426	2.493	2.446	3.343	3.891	3.04325	0.349763	3.598	6.26	4.426	4.363	4.66175	0.565007	2.803	4.3	5.156	6.09	4.58725	0.69808
		4	3.691	2.966	4.459	5.237	4.08825	0.489416	1.074	0.894	1.304	1.016	1.072	0.0859496	3.93	6.261	4.647	5.634	5.118	0.516873	3.858	1.945	4.576	5.691	4.0175	0.787042
		8	NA	NA	NA	NA	NA	NA	NA	NA	NA	NA	NA	NA	4.18	4.085	4.748	6.411	4.856	0.538602	5.435	3.202	4.828	5.167	4.658	0.50097
			NMN ganglia
			Exp 1	Exp 2	Exp 3	Exp 4			Exp 1	Exp 2	Exp 3	Exp 4			Exp 1	Exp 2	Exp 3	Exp 4			Exp 1	Exp 2	Exp 3	Exp 4
		Time (hours)	Wild-type +Vehicle				Mean	SEM	Wild-type +50uM Vacor				Mean	SEM	SARM1 KO +Vehicle				Mean	SEM	SARM1 KO +50uM Vacor				Mean	SEM
		0	0.067	0.078	0.09	0.097	0.083	0.00662067	0.067	0.078	0.09	0.097	0.083	0.00662067	0.1	0.09	0.088	NA	0.0926667	0.00371184	0.1	0.09	0.088	NA	0.0926667	0.00371184
		2	0.1	0.119	0.067	0.114	0.1	0.0117118	0.025	0.025	0.033	0.039	0.0305	0.00340343	0.072	0.07	0.098	0.091	0.08275	0.00694472	0.072	0.12	0.096	0.098	0.0965	0.00981071
		4	0.066	0.035	0.095	0.098	0.0735	0.0147224	0.022	0.023	0.028	0.029	0.0255	0.00175594	0.116	0.195	0.101	0.107	0.12975	0.0219673	0.133	0.112	0.106	0.147	0.1245	0.00947365
		8	NA	NA	NA	NA	NA	NA	NA	NA	NA	NA	NA	NA	0.084	0.165	0.101	0.131	0.12025	0.0178016	0.094	0.128	0.102	0.088	0.103	0.00881287
			NMN neurites
			Exp 1	Exp 2	Exp 3	Exp 4			Exp 1	Exp 2	Exp 3	Exp 4			Exp 1	Exp 2	Exp 3	Exp 4			Exp 1	Exp 2	Exp 3	Exp 4
		Time (hours)	Wild-type +Vehicle				Mean	SEM	Wild-type +50uM Vacor				Mean	SEM	SARM1 KO +Vehicle				Mean	SEM	SARM1 KO +50uM Vacor				Mean	SEM
		0	0.082	0.102	0.157	0.124	0.11625	0.0160643	0.082	0.102	0.157	0.124	0.11625	0.0160643	0.132	0.184	0.131	0.125	0.143	0.0137538	0.132	0.184	0.131	0.125	0.143	0.0137538
		2	0.125	0.133	0.157	0.124	0.13475	0.00768521	0.101	0.075	0.121	0.109	0.1015	0.00974252	0.175	0.201	0.137	0.153	0.1665	0.0138894	0.12	0.124	0.163	0.178	0.14625	0.0143549
		4	0.132	0.073	0.136	0.136	0.11925	0.0154455	0.078	0.054	0.088	0.052	0.068	0.00890693	0.184	0.203	0.145	0.152	0.171	0.0136321	0.204	0.06	0.144	0.167	0.14375	0.0305297
		8	NA	NA	NA	NA	NA	NA	NA	NA	NA	NA	NA	NA	0.194	0.121	0.144	0.195	0.1635	0.0185045	0.263	0.096	0.156	0.161	0.169	0.0346386
			NMN/NAD ratio ganglia
			Exp 1	Exp 2	Exp 3	Exp 4			Exp 1	Exp 2	Exp 3	Exp 4			Exp 1	Exp 2	Exp 3	Exp 4			Exp 1	Exp 2	Exp 3	Exp 4
		Time (hours)	Wild-type +Vehicle				Mean	SEM	Wild-type +50uM Vacor				Mean	SEM	SARM1 KO +Vehicle				Mean	SEM	SARM1 KO +50uM Vacor				Mean	SEM
		0	0.0325	0.0228	0.0284	0.0242	0.026975	0.00219255	0.0325	0.0228	0.0284	0.0242	0.026975	0.00219255	0.0337	0.0253	0.0397	NA	0.0329	0.00417612	0.0337	0.0253	0.0397	NA	0.0329	0.00417612
		2	0.0299	0.0234	0.0239	0.0244	0.0254	0.00151383	0.046	0.0378	0.0492	0.0384	0.04285	0.00282179	0.0344	0.0243	0.0298	0.0256	0.028525	0.00228304	0.0339	0.0256	0.0258	0.0228	0.027025	0.00239178
		4	0.0284	0.0258	0.0281	0.0222	0.026125	0.00143142	0.0729	0.0587	0.0705	0.0517	0.06345	0.00499692	0.0337	0.0256	0.0262	0.0236	0.027275	0.00221261	0.0385	0.0273	0.0278	0.0384	0.033	0.00314828
		8	NA	NA	NA	NA	NA	NA	NA	NA	NA	NA	NA	NA	0.033	0.0251	0.0292	0.0296	0.029225	0.0016178	0.0364	0.0258	0.0273	0.0239	0.02835	0.00277203
			NMN/NAD ratio neurites
			Exp 1	Exp 2	Exp 3	Exp 4			Exp 1	Exp 2	Exp 3	Exp 4			Exp 1	Exp 2	Exp 3	Exp 4			Exp 1	Exp 2	Exp 3	Exp 4
		Time (hours)	Wild-type +Vehicle				Mean	SEM	Wild-type +50uM Vacor				Mean	SEM	SARM1 KO +Vehicle				Mean	SEM	SARM1 KO +50uM Vacor				Mean	SEM
		0	0.0372	0.0252	0.0293	0.0259	0.0294	0.00274985	0.0372	0.0252	0.0293	0.0259	0.0294	0.00274985	0.0415	0.0315	0.0321	0.0262	0.032825	0.00318103	0.0415	0.0315	0.0321	0.0262	0.032825	0.00318103
		2	0.0352	0.0239	0.0315	0.0251	0.028925	0.00267531	0.0407	0.0308	0.0362	0.0281	0.03395	0.00281025	0.0485	0.0321	0.031	0.0351	0.036675	0.00403575	0.0429	0.0287	0.0316	0.0292	0.0331	0.00332741
		4	0.0357	0.0247	0.0305	0.026	0.029225	0.00249044	0.0728	0.06	0.0675	0.0515	0.06295	0.00463258	0.0467	0.0324	0.0313	0.0269	0.034325	0.0042927	0.0528	0.0308	0.0315	0.0294	0.036125	0.00557545
		8	NA	NA	NA	NA	NA	NA	NA	NA	NA	NA	NA	NA	0.0464	0.0296	0.0303	0.0304	0.034175	0.00407888	0.0483	0.0301	0.0323	0.0311	0.03545	0.00430687

## Sheet: Figure 4 C-D
	Figure 4 source data 1
		DRG cADPR mesurements Figure 4 C,D
		Whole cultures
			Wild-type+Vehicle	Wild-type+50 μM Vacor	SARM1 KO +Vehicle	SARM1 KO+50 μM Vacor
		Exp 1	0	0.0209	0	0
		Exp 2	0	0.0145	0	0
		Exp 3	0	0.0155	0	0
		Mean	0	0.0169667	0	0
		SEM	0	0.00198774	0	0
		Ganglia
			Wild-type+Vehicle	Wild-type+50 μM Vacor	SARM1 KO +Vehicle	SARM1 KO+50 μM Vacor
		Exp 1	0	0.023	0	0
		Naurites
			Wild-type+Vehicle	Wild-type+50 μM Vacor	SARM1 KO +Vehicle	SARM1 KO+50 μM Vacor
		Exp 1	0	0.0163	0	0

## Sheet: Figure 4 E-F
	Figure 4 source data 1
		NMN deamidase microinjection Figure 4 E,F
		% healthy neurites
				Exp 1	Exp 2	Exp 3			Exp 1	Exp 2	Exp 3			Exp 1	Exp 2	Exp 3			Exp 1	Exp 2	Exp 3
			Time (hours)	hSARM1+GFP +Vehicle			Mean	SEM	hSARM1+ GFP +100 μM Vacor			Mean	SEM	hSARM1+NMN deamidase +Vehicle			Mean	SEM	hSARM1+NMN deamidase +100 μM Vacor			Mean	SEM
			0	100	100	100	100	0	100	100	100	100	0	100	100	100	100	0	100	100	100	100	0
			8	82.684	68.9394	94.4444	82.0226	7.3701	6.14379	20	17.029	14.3909	4.21181	98.5507	87.963	100	95.5046	3.79394	9.73229	21.329	26.6667	19.2426	4.9986
		% viable neurons
				Exp 1	Exp 2	Exp 3			Exp 1	Exp 2	Exp 3			Exp 1	Exp 2	Exp 3			Exp 1	Exp 2	Exp 3
			Time (hours)	hSARM1+GFP +Vehicle			Mean	SEM	hSARM1+ GFP +100 μM Vacor			Mean	SEM	hSARM1+NMN deamidase +Vehicle			Mean	SEM	hSARM1+NMN deamidase +100 μM Vacor			Mean	SEM
			0	100	100	100	100	0	100	100	100	100	0	100	100	100	100	0	100	100	100	100	0
			8	91.6667	88.8889	100	93.5185	3.33847	16.6667	33.3333	8.33333	19.4444	7.34931	94.4444	83.3333	77.7778	85.1852	4.89954	5.55556	0	27.7778	11.1111	8.48625
