# Supplementary material for: Neurotoxin-mediated potent activation of the axon degeneration regulator SARM1
Source: eLife journal article supplement (doi:10.7554/elife.72823), 2021-12-06
Supplement: supp [file elife-72823-supp-v1.zip › elife_poa_e72823_Figure_5_figure_supplement_1.pdf]

A

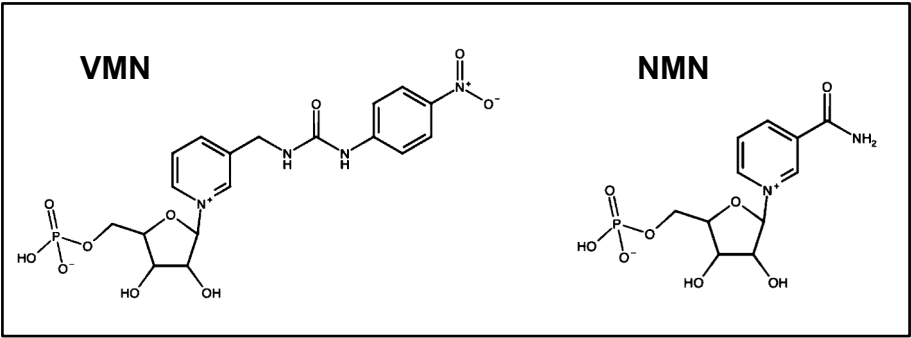

B

Basal hSARM1 NADase rate

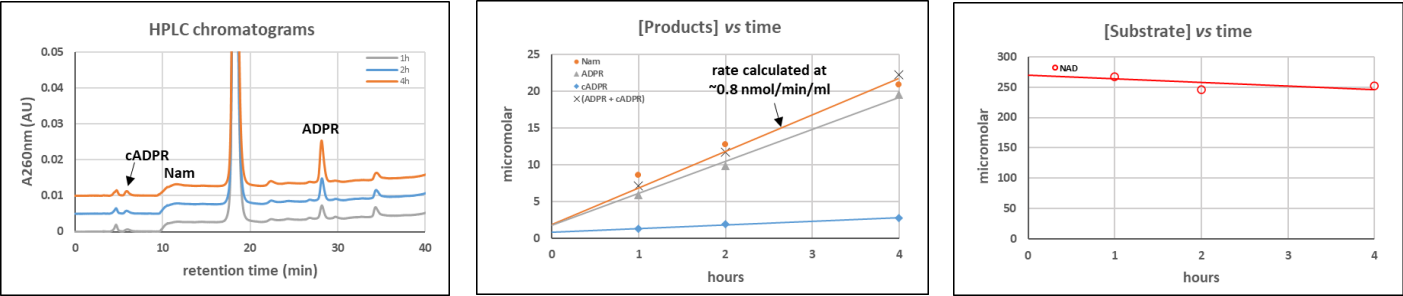

C

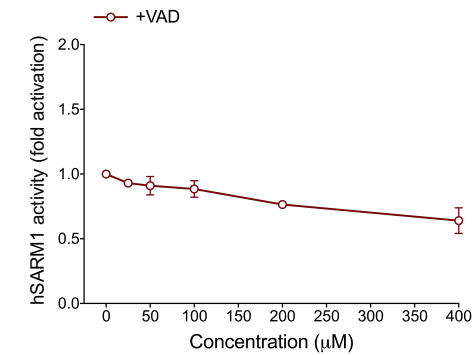

D

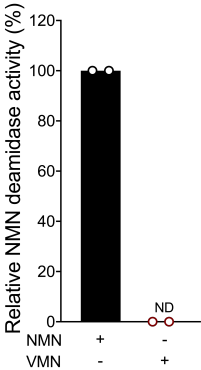

E

| 4 hours after Vacor addition |                       |                       |
|------------------------------|-----------------------|-----------------------|
|                              | DRG ganglia           | DRG neurites          |
|                              | pmol/ $\mu$ g protein | pmol/ $\mu$ g protein |
| Vacor                        | 2.25                  | 1.09                  |
| VMN                          | 0.17                  | 0.02                  |
| VAD                          | 0.16                  | 0.03                  |
