# Supplementary material for: Neurotoxin-mediated potent activation of the axon degeneration regulator SARM1
Source: eLife journal article supplement (doi:10.7554/elife.72823), 2021-12-06
Supplement: supp [file elife-72823-supp-v1.zip › elife_poa_e72823_Figure_5_figure_supplement_1_source_data_1.xlsx]

## Sheet: Figure 5-Fig supplement 1 C-D
	Figure 5-Figure supplement 1 source data 1
		hSARM1 activity - Figure 5-Figure supplement 1C
				Exp 1	Exp 2
			Concentration µM	+VAD			Mean	SD
			0	1	1		1	0
			25	0.95	0.91		0.93	0.0282843
			50	0.86	0.96		0.91	0.0707107
			100	0.84	0.93		0.885	0.0636396
			200	0.76	0.77		0.765	0.00707107
			400	0.71	0.57		0.64	0.0989949
		NMN deamidase activity - Figure 5-Figure supplement 1C
				Exp 1	Exp 2
				Control	VMN
			Exp 1	100	0
			Exp 2	100	0
			Mean	100	0
			SD	0	0
