# Supplementary material for: Neurotoxin-mediated potent activation of the axon degeneration regulator SARM1
Source: eLife journal article supplement (doi:10.7554/elife.72823), 2021-12-06

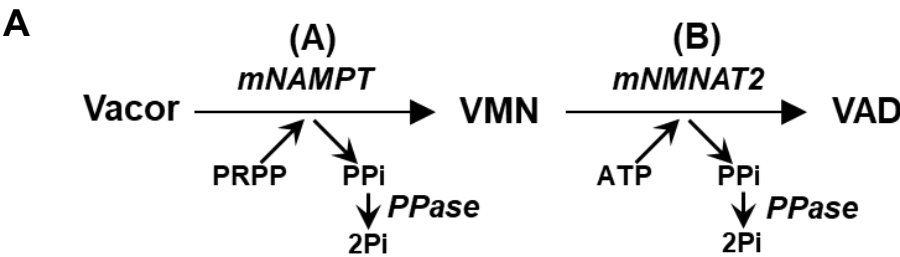

**B**

|                                      | Mix (A) for VMN |                 | Mix (A+B) for VAD           |             |
|--------------------------------------|-----------------|-----------------|-----------------------------|-------------|
|                                      | ml              | final [ ]       | ml                          | final [ ]   |
| H <sub>2</sub> O                     | 12.8            | -               | 12.2                        |             |
| HEPES/NaOH 1 M, pH 7.5               | 0.75            | 50 mM           | 0.75                        | 50 mM       |
| MgCl <sub>2</sub> 1 M                | 0.30            | 20 mM           | 0.30                        | 20 mM       |
| ATP 100 mM                           | 0.15            | 1 mM            | 0.30                        | 2 mM        |
| PRPP 50 mM                           | 0.15            | 0.5 mM          | 0.15                        | 0.5 mM      |
| Vacor 9 mM                           | 0.50            | 0.3 mM          | 0.50                        | 0.3 mM      |
| <u>mNAMPT wild type ~0.25 U/ml</u>   | 0.35 (*)        | <u>~6 mU/ml</u> | 0.35 (*)                    | ~0.006 U/ml |
| <u>mNMNAT2 wild type ~2.5 U/ml</u>   | -               | -               | 0.44 (*)                    | ~0.075 U/ml |
| <u>Yeast PPase Sigma &gt;2 KU/ml</u> | -               | -               | 0.01                        | >1.33 U/ml  |
| Final mix                            | 15 ml           |                 | 15 ml                       |             |
| Incubation settings                  | 2-3 hr at 37 °C |                 | Overnight (~19 hr) at 30 °C |             |

(\*) Reagent(s) added to start the reactions.

**C**

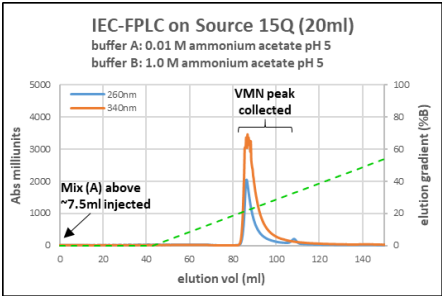

**D**

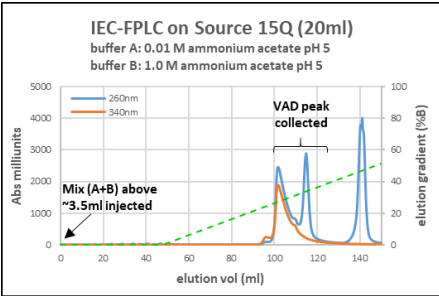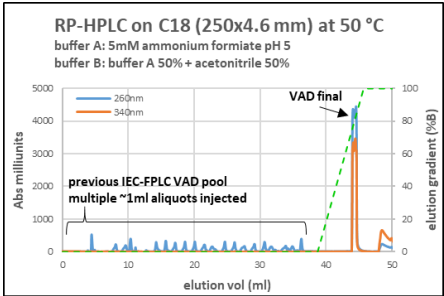

Supplement: supp [file elife-72823-supp-v1.zip › elife_poa_e72823_Figure_5_figure_supplement_2.pdf]
