# Supplementary material for: Neurotoxin-mediated potent activation of the axon degeneration regulator SARM1
Source: eLife journal article supplement (doi:10.7554/elife.72823), 2021-12-06
Supplement: supp [file elife-72823-supp-v1.zip › elife_poa_e72823_Figure_5_source_data_1.xlsx]

## Sheet: Figure 5 A
	Figure 5 source data 1
		hSARM1 activity Figure 5A
				Exp 1	Exp 2	Exp 3			Exp 1	Exp 2	Exp 3
			Concentration µM	+NMN			Mean	SEM	+VMN			Mean	SEM
			0	1	1	1	1	0	1	1	1	1	0
			3.125	1.13	1.6	1.01	1.24667	0.180031	0.94	NA	1.62	1.28	0.34
			6.25	1.19	1.44	1.39	1.34	0.0763763	1.92	2.34	3.02	2.42667	0.320486
			12.5	1.78	1.67	1.82	1.75667	0.0448454	3.46	3.47	4.09	3.67333	0.208353
			25	2.48	1.9	2.69	2.35667	0.236244	5.12	4.99	8.04	6.05	0.995707
			50	3.34	3.13	3.69	3.38667	0.163333	6.23	6.22	8.62	7.02333	0.798339
			100	3.77	4.05	4.95	4.25667	0.355965	4.98	5.75	6.79	5.84	0.524436
			200	4.37	4.54	6.23	5.04667	0.593698	2.81	3.69	5.26	3.92	0.716543
			500	3.9	4.96	7.6	5.48667	1.10008	2.11	1.25	1.08	1.48	0.3188
			1000	3.79	4.89	7.16	5.28	0.992186	NA	0.83	1.12	0.975	0.118392

## Sheet: Figure 5 B-C
	Figure 5 source data 1
		DRG VMN- degeneration index Figure 5B,C
			Exp 1	Exp 2	Exp 3			Exp 1	Exp 2	Exp 3			Exp 1	Exp 2	Exp 3			Exp 1	Exp 2	Exp 3
		Time (hours)	Wild-type +Vehicle			Mean	SEM	Wild-type +500 μM VMN			Mean	SEM	Sarm1-/- +Vehicle			Mean	SEM	Sarm1-/- +500 μM VMN			Mean	SEM
		0	0.221033	0.234333	0.299133	0.2515	0.0241241	0.311167	0.2745	0.1645	0.250056	0.0440678	0.226033	0.202333	0.254333	0.227567	0.0150307	0.3235	0.2323	0.137567	0.231122	0.0536776
		8	0.245433	0.157667	0.228467	0.210522	0.0268778	0.377933	0.252167	0.1796	0.2699	0.0579364	0.2494	0.2381	0.265867	0.251122	0.00806167	0.310367	0.1761	0.174067	0.220178	0.0450983
		24	0.2198	0.124233	0.1486	0.164211	0.0286707	0.6955	0.4345	0.3308	0.486933	0.108495	0.2773	0.143833	0.155833	0.192322	0.0426299	0.297267	0.135633	0.131	0.187967	0.0546664
		48	0.192267	0.1569	0.141767	0.163644	0.014963	0.552333	0.638567	0.4224	0.537767	0.0628255	0.115407	0.178733	0.1617	0.151947	0.0189201	0.243633	0.153333	0.1057	0.167556	0.0404479
		72	0.1637	0.1248	0.101067	0.129856	0.0182565	0.692167	1	0.4655	0.719222	0.154889	0.155033	0.2035	0.123267	0.1606	0.023328	0.239067	0.1033	0.105667	0.149344	0.0448663
