# Supplementary material for: Neurotoxin-mediated potent activation of the axon degeneration regulator SARM1
Source: eLife journal article supplement (doi:10.7554/elife.72823), 2021-12-06
Supplement: supp [file elife-72823-supp-v1.zip › elife_poa_e72823_Figure_6_figure_supplement_2.pdf]

dSARM1\_307-992 NGQMTKLTADILKLDLCKSLTA.....TEQTINKYSNMZTSIVSSLQEDERGSSAIT  
 hSARM1\_1-724 MVLTLGLSAYKLCRFFAMSGPRFPGAERLAVPGPDGGGGTGPWWAAGGRGPRFVSPGAGTEVQDADLERALPELQQAALSALK.....

H3 (ARM1) H1 (ARM2) H2 (ARM2) H3 (ARM2) H1 (ARM3)  
 dSARM1\_307-992 VHDVGGKK..SQYLEKINEVIRRAWAVPTHGHELGYSLCNSLRQSGGLDILLMKNCVKPDLQ..FSSAQALLEQCLTTENRKHVVDNGLDKV  
 hSARM1\_1-724 ..QAGGARAVGAGLAELVFQVLEEAALLRAVGRGRVLAQGLCDATIRLDGGDLILLRLQLAPLELTRVQAARLLEQILVAENRDRVARIGLGVIF

H2 (ARM3) H3 (ARM3) H1 (ARM4) H2 (ARM4) H3 (ARM4) H1 (ARM5) H2 (ARM5)  
 dSARM1\_307-992 VNVAVCVCTKNSNMHESRVGTGILEHLFKHSECTCSQVIRLGGDLDAVLFECRTSDLETLRHCAASALANLSLYGGAENQEEMLLRKVPWMLF  
 hSARM1\_1-724 LNLAK..EREPVEARLSVAGILEHMFKHSEBETCORLVAAGGLDAVLYWCRRTDPALLRHCAALGNCALHGGQAVQRRMVEKRAAEWLF

H3 (ARM5) H1 (ARM6) H2 (ARM6) H3 (ARM6) H2 (ARM7)  
 dSARM1\_307-992 PLAFHNDNDN.TKYYACLAHAVLVANKEIEAEVLKSGCLDLVEPFVTVSHDFSAFARSNLA..HAHGQSKHWWLKRVLVPLSSNRBEARNLA  
 hSARM1\_1-724 PLAFSKEDDELRLHLACLAVALATNKKEVEREVRSGTLALVEPLVASLDGRFARCLVDAASDTSQGRGPDLDLQRLVPLLDLSNRLEAACQCLG

H3 (ARM7) H1 (ARM8) H2 (ARM8) H3 (ARM8)  
 dSARM1\_307-992 AFHFCEAGIKIREOCNTDITREINATEALKNVAS.CPNAIASKFAAQALRLIGETVPHKLSQOVPLWSVEDVQEWVKQIGFNDYIDKENE  
 hSARM1\_1-724 AAYLCAEAAIKLSLQCKTKKVFSDIGAIQSILKRLVSYSTNGTKSALAKRALRLIGETVPRPILFVSPWSKEAEVQITWQOIGFSKYCESEFE

SAM1 SAM2  
 dSARM1\_307-992 SQVDGDLILLKINQDNIRADICIGICNGILLKRFRELEQLNLRKMAVYSKSDTAKMHQFLSEITGTDVCTYTYAMLNACIDKCALPHVNEIDMLMT  
 hSARM1\_1-724 QQVDGDLILLRLTEEBLQTDLGCMKSGITRKRFRELEBLKTFANYSTCDRSNLADWLGSIDPREQYTYGLVSCGLDRSLDHRVSEQQQLLE

dSARM1\_307-992 ECGIENSHIRERILNAVKNL.LENSLPSSEENMAKTEFDVFSYRRNSGSQLASLLKVHLQLRGFSVFIDVRLKLEAGKFDNGLLNSIRQAK  
 hSARM1\_1-724 DCGIELGVRRARILTAAREMLHSLPLCGGGKPSGDFDVFESYRRNSGSQLASLLKVHLQLRGFSVFIDVRLKLEAGKFEDEKLIQSVMGAR

TIR  
 dSARM1\_307-992 NFVLVLTPDALHRCINDECDKDWVREIVAAALNSNCNIIPIIDQOFDWPVEVERLPEDMRSAHFNGVNIWDYQDCAIDKLERFLRGEKN  
 hSARM1\_1-724 NFVLVLSPGALDKCMQDHCDKDWVHKEIVTALSCKGNIVPIID.GFEWPEPQVLPEDMQAVLTFNGELKWSHEYQATIEKILIRFLQGRSS

dSARM1\_307-992 IDRIAA.....MVPG  
 hSARM1\_1-724 RDSSAGSDTSLEGAAPMGPT

| <i>Drosophila</i> (Human) | VMN moieties | Interaction   |
|---------------------------|--------------|---------------|
| <b>W385</b> (W103)        | pyridine     | pi-stacking   |
| <b>H392</b> (R110)        | nitrobenzene | pi-stacking   |
|                           | urea         | hydrogen bond |
| <b>Y396</b> (Q114)        | phosphate    | hydrogen bond |
| <b>E429</b> (E149)        | ribose       | hydrogen bond |
| <b>L432</b> (L152)        | ribose       | hydrogen bond |
| <b>R437</b> (R157)        | phosphate    | hydrogen bond |
| <b>H473</b> (H190)        | ribose       | hydrogen bond |
| <b>K476</b> (K193)        | phosphate    | hydrogen bond |
| <b>N640</b> (K361)        | nitro        | hydrogen bond |
