# Supplementary material for: Neurotoxin-mediated potent activation of the axon degeneration regulator SARM1
Source: eLife journal article supplement (doi:10.7554/elife.72823), 2021-12-06
Supplement: supp [file elife-72823-supp-v1.zip › elife_poa_e72823_Figure_7_source_data_1.xlsx]

## Sheet: Figure 7 A-F
	Figure 7- source data 1
		W103A hSARM1 microinjection Figure 7A,B
		% healthy neurites
				Exp 1	Exp 2	Exp 3			Exp 1	Exp 2	Exp 3			Exp 1	Exp 2	Exp 3			Exp 1	Exp 2	Exp 3
			Time (hours)	hSARM1 +Vehicle			Mean	SEM	hSARM1 +100 μM Vacor			Mean	SEM	W103A hSARM1 +Vehicle			Mean	SEM	W103A hSARM1+100 μM Vacor			Mean	SEM
			0	100	100	100	100	0	100	100	100	100	0	100	100	100	100	0	100	100	100	100	0
			8	94.4444	89.4737	85.3535	89.7572	2.62815	0	3.0303	5.55556	2.86195	1.60596	96.8046	93.1111	90.2083	93.3747	1.90875	84	95.3102	91.6667	90.3256	3.33313
		% viable neurons
				Exp 1	Exp 2	Exp 3			Exp 1	Exp 2	Exp 3			Exp 1	Exp 2	Exp 3			Exp 1	Exp 2	Exp 3
			Time (hours)	hSARM1 +Vehicle			Mean	SEM	hSARM1 +100 μM Vacor			Mean	SEM	W103A hSARM1 +Vehicle			Mean	SEM	W103A hSARM1+100 μM Vacor			Mean	SEM
			0	100	100	100	100	0	100	100	100	100	0	100	100	100	100	0	100	100	100	100	0
			8	88.8889	100	83.3333	90.7407	4.89954	0	16.6667	27.7778	14.8148	8.07204	91.6667	95.8333	100	95.8333	2.40563	100	94.4444	100	98.1481	1.85185
		R157A hSARM1 microinjection Figure 7C,D
		% healthy neurites
				Exp 1	Exp 2	Exp 3			Exp 1	Exp 2	Exp 3			Exp 1	Exp 2	Exp 3			Exp 1	Exp 2	Exp 3
			Time (hours)	hSARM1 +Vehicle			Mean	SEM	hSARM1 +100 μM Vacor			Mean	SEM	R157A hSARM1 +Vehicle			Mean	SEM	R157A hSARM1+100 μM Vacor			Mean	SEM
			0	100	100	100	100	0	100	100	100	100	0	100	100	100	100	0	100	100	100	100	0
			8	96.5774	89.4737	85.3535	90.4682	3.27798	7.93651	3.0303	0	3.6556	2.31231	94.1975	97.7778	93.0952	95.0235	1.41342	92.3412	96.2963	94.4444	94.3607	1.1425
		% viable neurons
				Exp 1	Exp 2	Exp 3			Exp 1	Exp 2	Exp 3			Exp 1	Exp 2	Exp 3			Exp 1	Exp 2	Exp 3
			Time (hours)	hSARM1 +Vehicle			Mean	SEM	hSARM1 +100 μM Vacor			Mean	SEM	R157A hSARM1 +Vehicle			Mean	SEM	R157A hSARM1+100 μM Vacor			Mean	SEM
			0	100	100	100	100	0	100	100	100	100	0	100	100	100	100	0	100	100	100	100	0
			8	86.6667	100	83.3333	90	5.09175	8.33333	16.6667	27.7778	17.5926	5.63219	92.5926	100	100	97.5309	2.46914	73.8095	77.7778	83.3333	78.3069	2.76199
		K193R hSARM1 microinjection Figure 7E,F
		% healthy neurites
			Time (hours)	hSARM1 +Vehicle			Mean	SEM	hSARM1 +100 μM Vacor			Mean	SEM	K193R hSARM1 +Vehicle			Mean	SEM	K193R hSARM1+100 μM Vacor			Mean	SEM
			0	100	100	100	100	0	100	100	100	100	0	100	100	100	100	0	100	100	100	100	0
			8	96.5774	94.4444	85.3535	92.1251	3.44132	7.93651	0	5.55556	4.49735	2.35137	83.6825	95.8333	95.2381	91.5847	3.95479	80.6548	96.6667	88.8889	88.7368	4.62286
		% viable neurons
			Time (hours)	hSARM1 +Vehicle			Mean	SEM	hSARM1 +100 μM Vacor			Mean	SEM	K193R hSARM1 +Vehicle			Mean	SEM	K193R hSARM1+100 μM Vacor			Mean	SEM
			0	100	100	100	100	0	100	100	100	100	0	100	100	100	100	0	100	100	100	100	0
			8	86.6667	88.8889	83.3333	86.2963	1.61441	8.33333	0	27.7778	12.037	8.22981	61.1111	83.3333	93.3333	79.2593	9.52219	81.1111	94.4444	100	91.8519	5.60472

## Sheet: Figure 7 G
	Figure 7- source data 1
		K193R hSARM1 activity Figure 7G
				Exp 1	Exp 2	Exp 3			Exp 1	Exp 2	Exp 3
			Concentration µM	+NMN			Mean	SEM	+VMN			Mean	SEM
			0	1	1	1	1	0	1	1	1	1	0
			3.125	NA	1.02	1.12	1.07	0.05	NA	1	1.01	1.005	0.005
			6.25	NA	1.09	1.09	1.09	0	NA	1.03	1.03	1.03	0
			12.5	NA	1.08	1.07	1.075	0.005	NA	1	1.13	1.065	0.065
			25	NA	1.06	1.06	1.06	0	NA	1.09	1.12	1.105	0.015
			50	NA	1	1.08	1.04	0.04	NA	1.13	1.22	1.175	0.045
			100	0.88	1.02	1.03	0.976667	0.0484195	1.5	1.35	1.43	1.42667	0.0433333
			200	0.88	1.02	1.07	0.99	0.0568624	1.06	1.71	1.72	1.49667	0.218352
			500	0.99	0.96	1.04	0.996667	0.0233333	0.47	1.85	2.25	1.52333	0.539176
			1000	0.77	0.96	0.98	0.903333	0.0669162	0.18	1.07	1.15	0.8	0.310859
