# Supplementary figures and images for: Neurotoxin-mediated potent activation of the axon degeneration regulator SARM1
Source: eLife journal article supplement (doi:10.7554/elife.72823), 2021-12-06

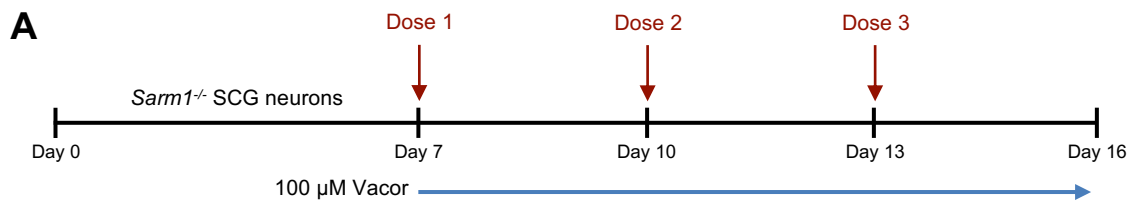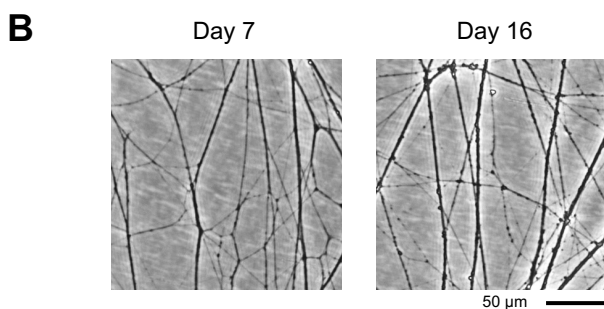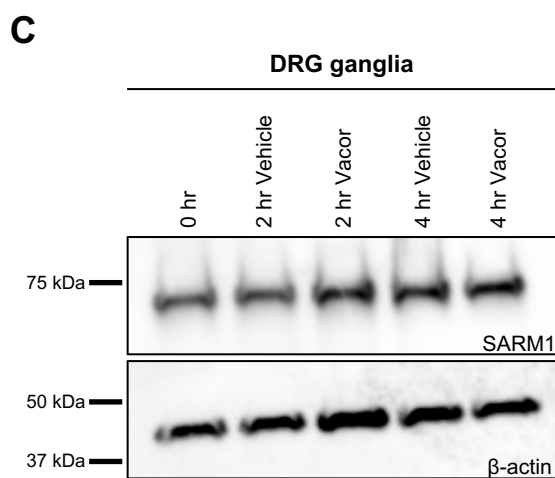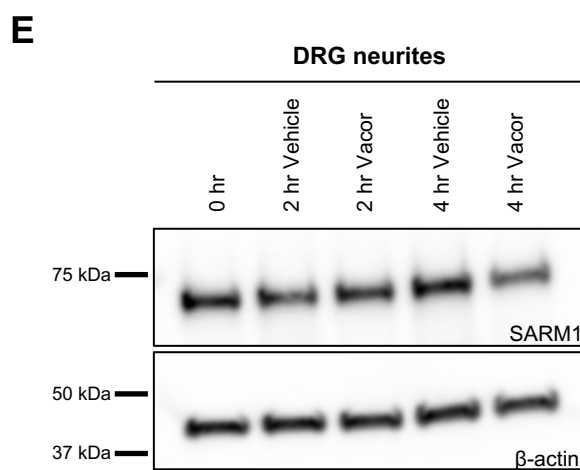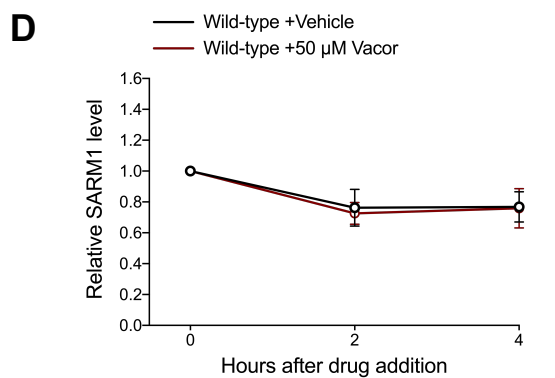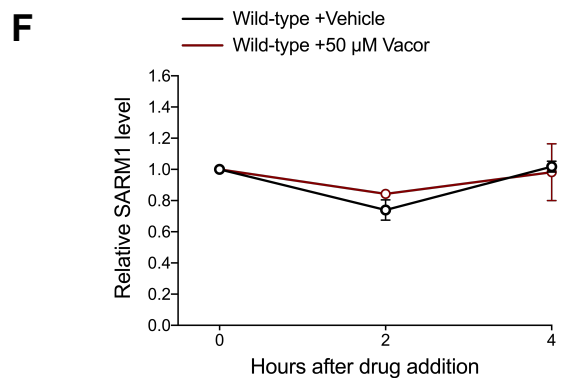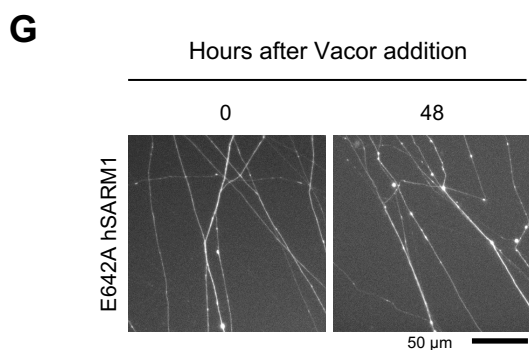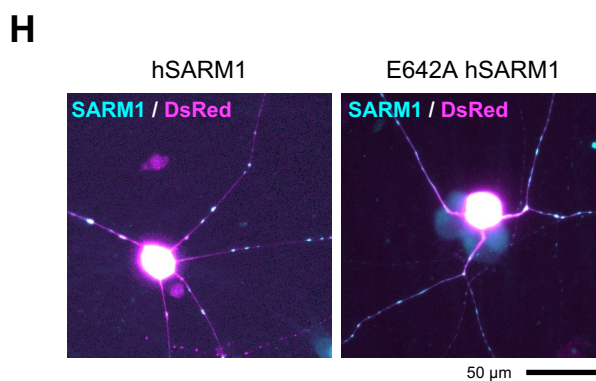

Supplement: supp [file elife-72823-supp-v1.zip › elife_poa_e72823_Figure_2_figure_supplement_1.pdf]

**A**

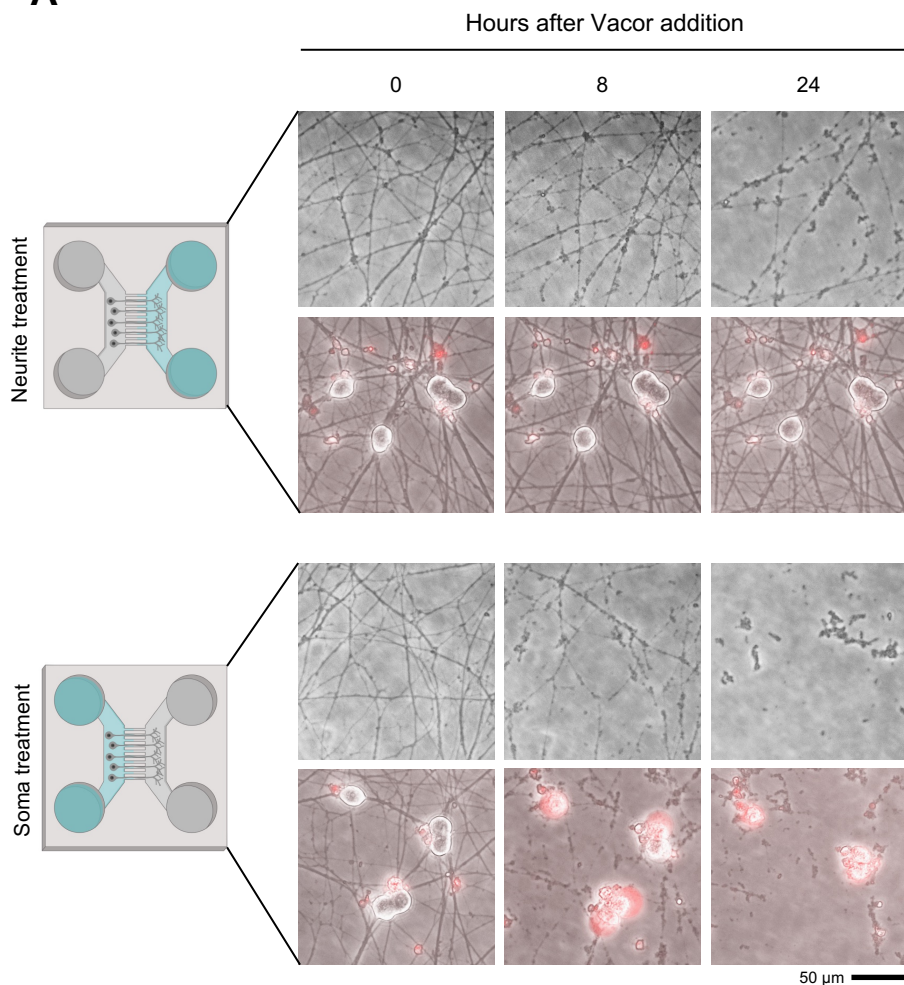

**B**

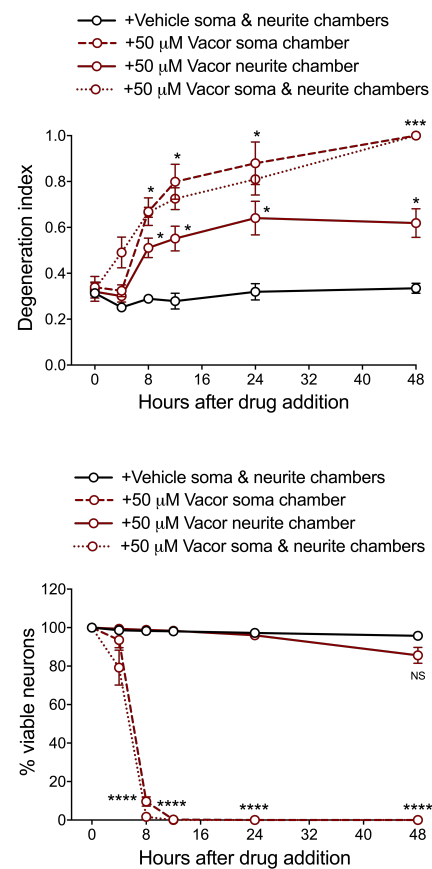

Supplement: supp [file elife-72823-supp-v1.zip › elife_poa_e72823_Figure_2_figure_supplement_2.pdf]

**A**

**pSRT (RGC responses)**

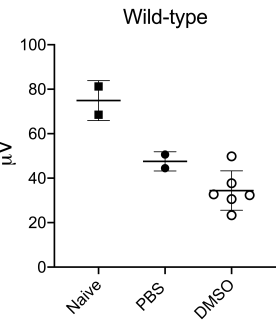

**B wave (bipolar responses)**

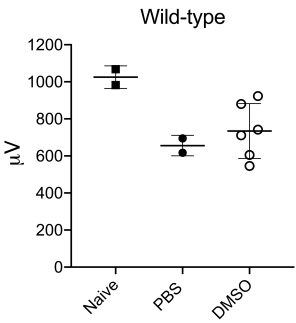

**A wave (photoreceptor responses)**

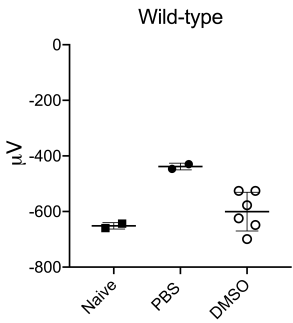

**B**

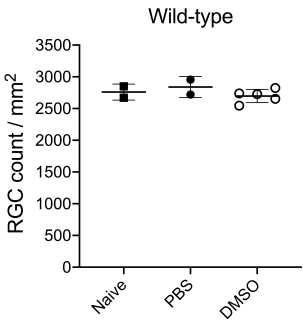

Supplement: supp [file elife-72823-supp-v1.zip › elife_poa_e72823_Figure_3_figure_supplement_1.pdf]

A

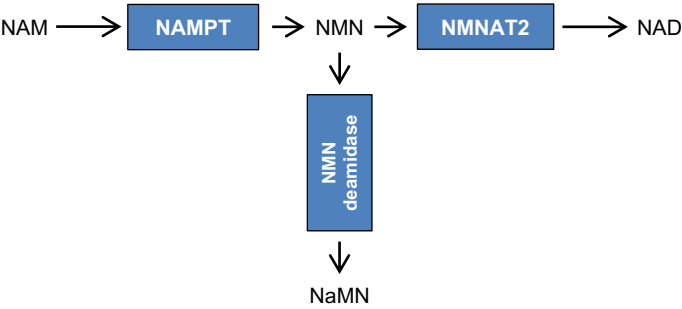

B

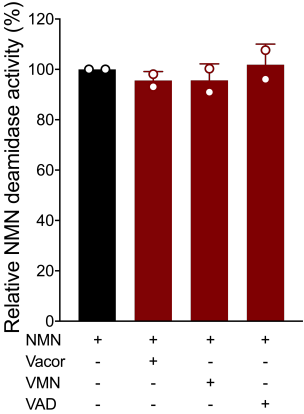

C

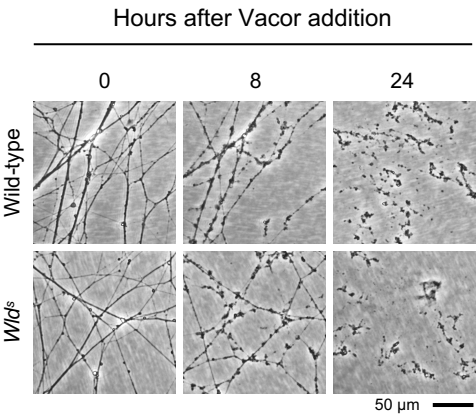

D

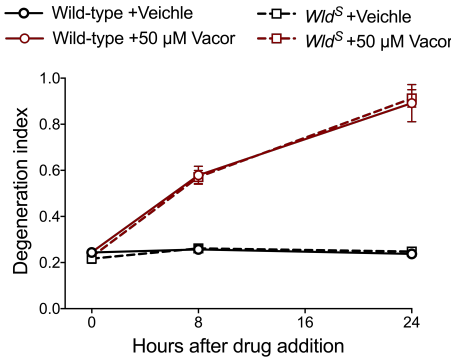

Supplement: supp [file elife-72823-supp-v1.zip › elife_poa_e72823_Figure_4_figure_supplement_1.pdf]

**A**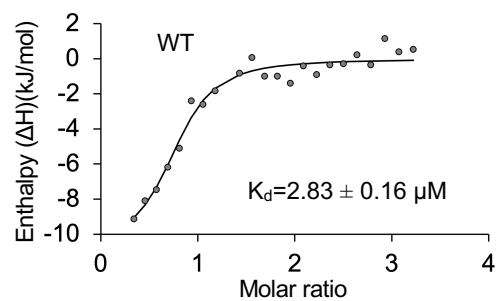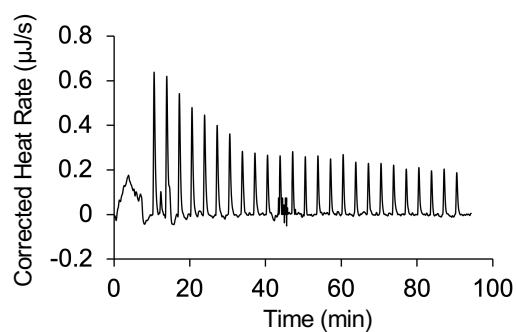**B**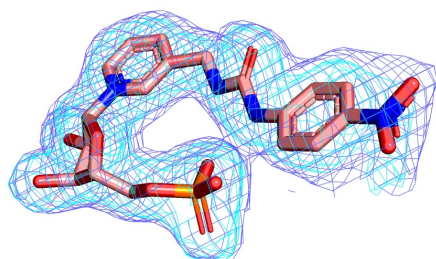**C**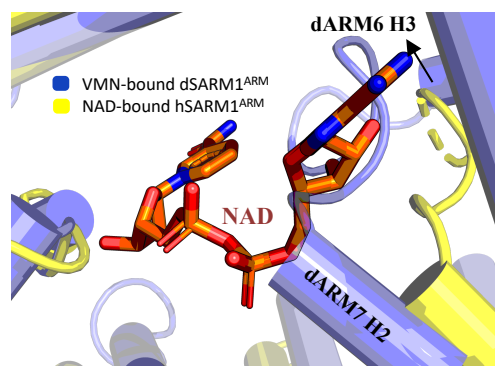

Supplement: supp [file elife-72823-supp-v1.zip › elife_poa_e72823_Figure_6_figure_supplement_1.pdf]

**A**

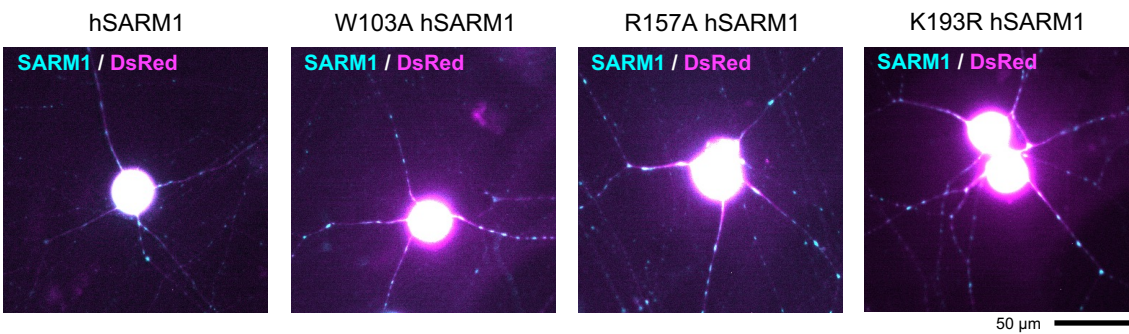

Supplement: supp [file elife-72823-supp-v1.zip › elife_poa_e72823_Figure_7_figure_supplement_1.pdf]
